# Supplementary material
Source: PubMed Central journal article supplement (PMC1887603)

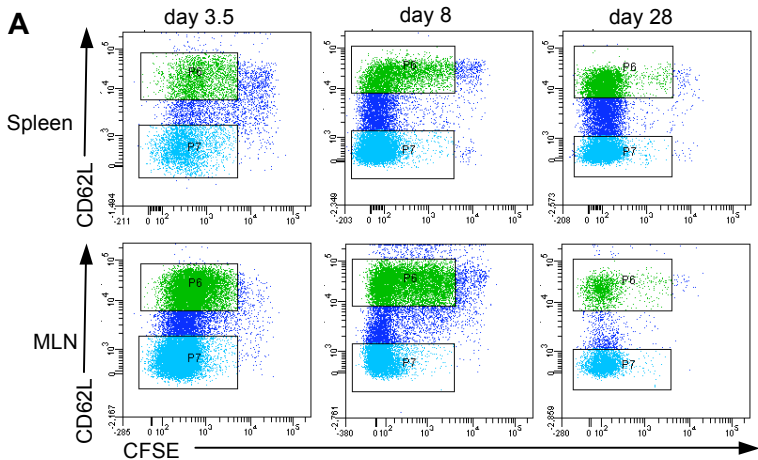

**Numbers of CD62L<sup>lo</sup> and CD62L<sup>hi</sup> OT-I cells per organ**

**B**

| Cells                        | d3.5    | d8      | d28    |
|------------------------------|---------|---------|--------|
| CD62L <sup>hi</sup> (spleen) | 10,714  | 136,210 | 10,097 |
| CD62L <sup>lo</sup> (spleen) | 12,571  | 59,219  | 11,657 |
| CD62L <sup>hi</sup> (MLN)    | 128,571 | 27,423  | 7,805  |
| CD62L <sup>lo</sup> (MLN)    | 102,857 | 24,322  | 16,484 |

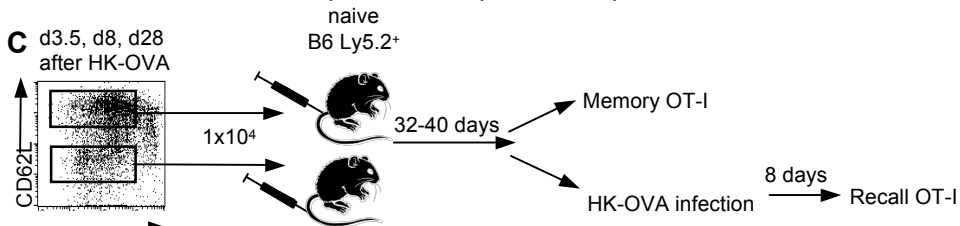

Supplement: pnas_0703699104_1.pdf [file pnas_0703699104_1.pdf]
