# Supplementary material
Source: PubMed Central journal article supplement (PMC1887603)

# Numbers of "resting memory" T cells

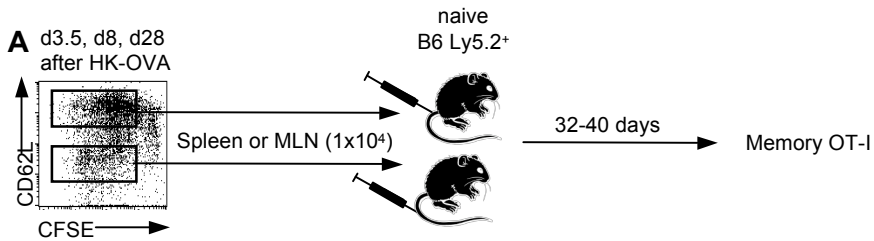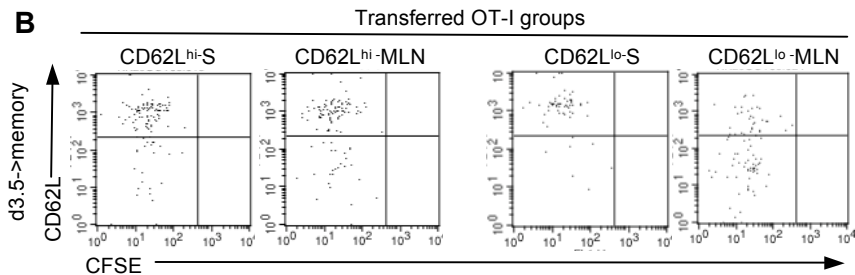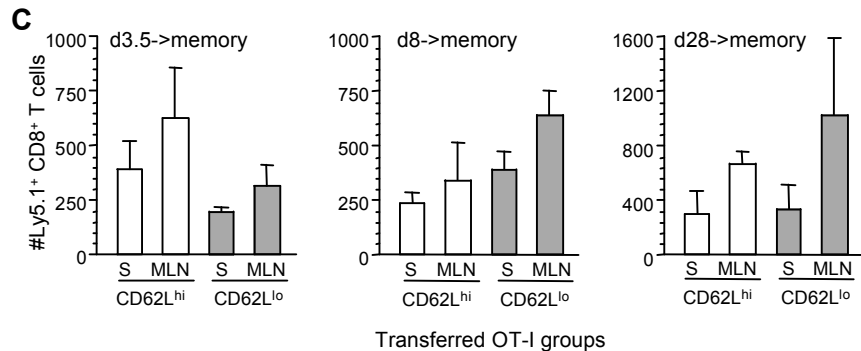

Supplement: pnas_0703699104_2.pdf [file pnas_0703699104_2.pdf]

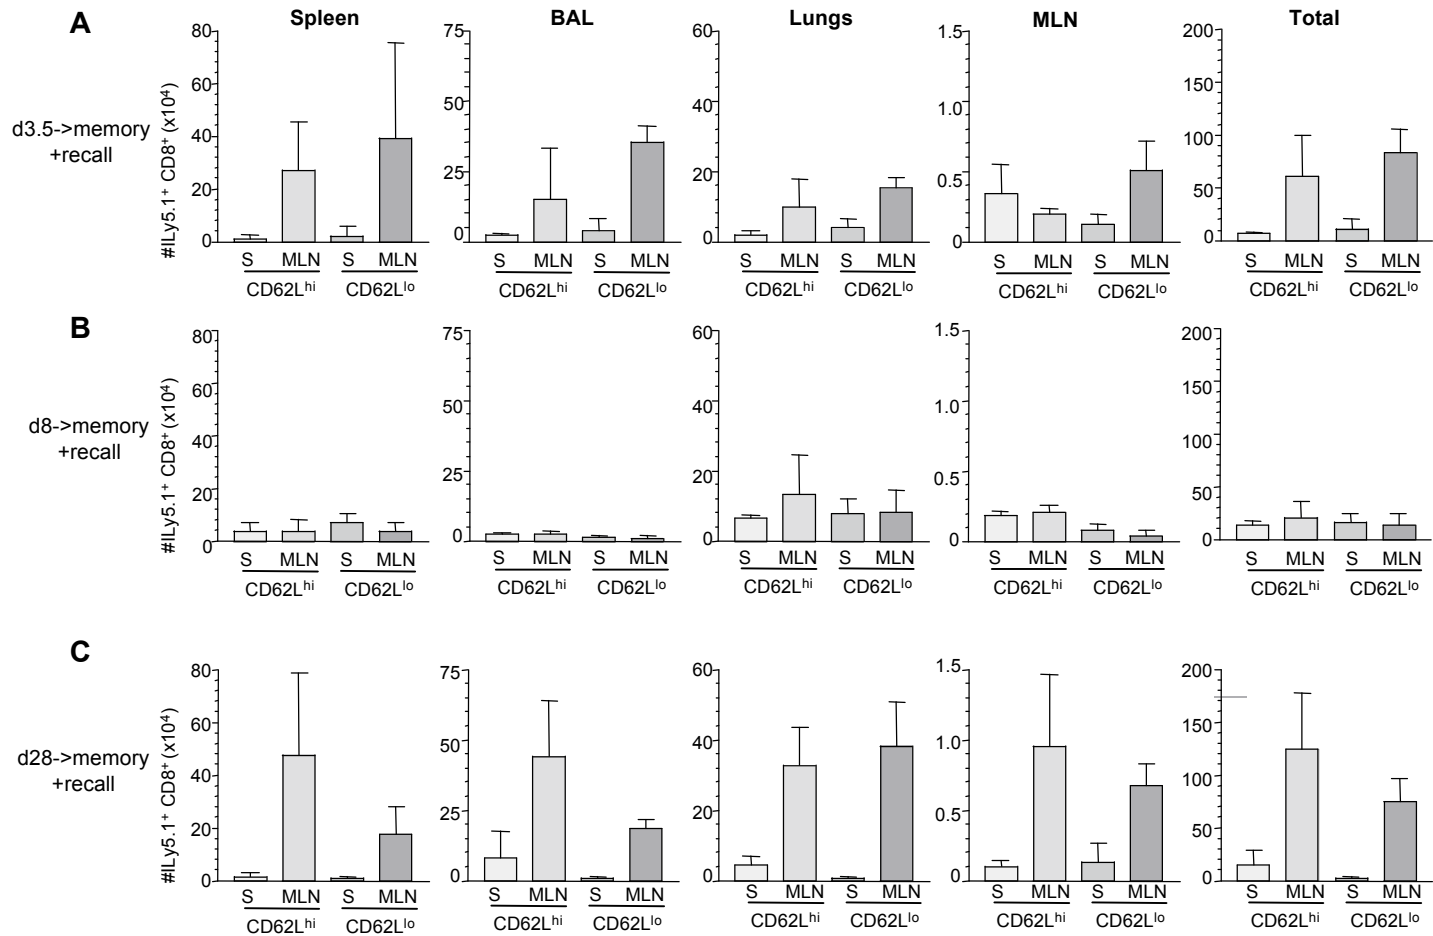

Supplement: pnas_0703699104_3.pdf [file pnas_0703699104_3.pdf]

# CD62L phenotype of d8 secondary T cells

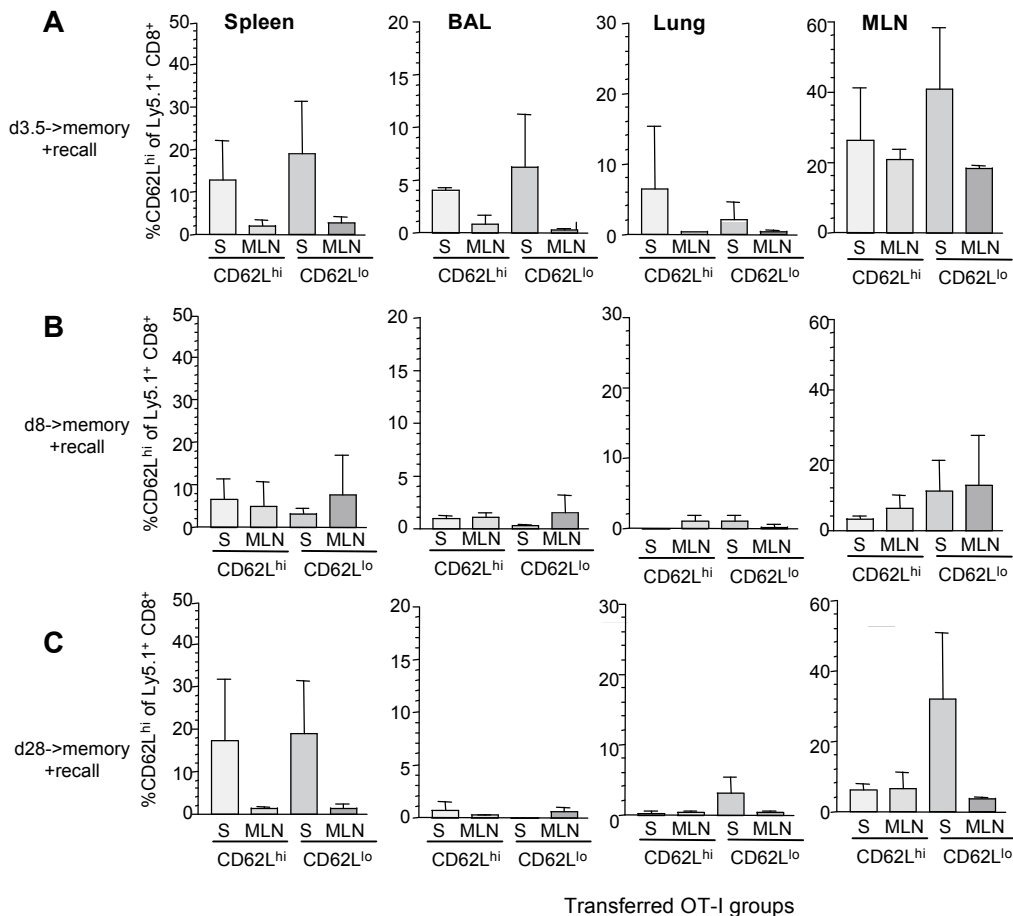

Supplement: pnas_0703699104_4.pdf [file pnas_0703699104_4.pdf]

# Surface characteristics of d3.5 primary responders

OT-I + HK-OVA (d3.5)

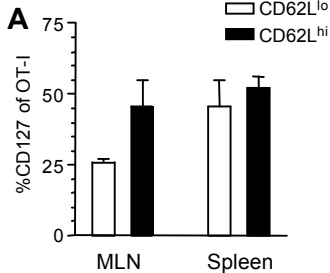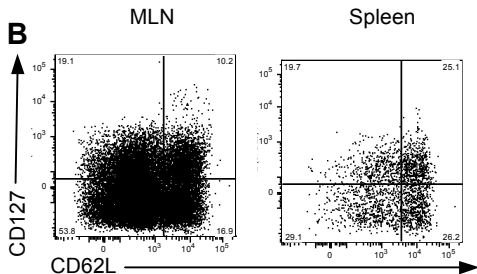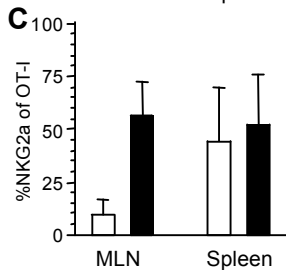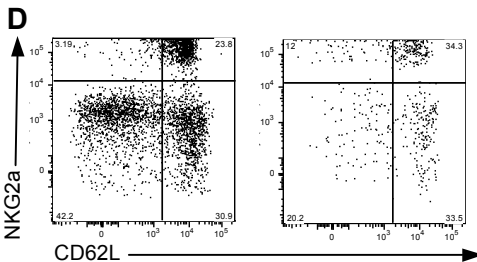

Supplement: pnas_0703699104_5.pdf [file pnas_0703699104_5.pdf]
